# Supplementary material for: Comparative Effects between Oral Lactoferrin and Ferrous Sulfate Supplementation on Iron-Deficiency Anemia: A Comprehensive Review and Meta-Analysis of Clinical Trials
Source: MDPI journal article supplement (doi:10.3390/nu14030543), 2022-01-27
Supplement: s1 [file s1]

---

**Comparative effects between oral lactoferrin and ferrous sulfate supplementation on iron-deficiency anemia: a comprehensive review and meta-analysis of clinical trials**

**Table S1.** Characteristics of the publications included in the meta-analysis.

**Table S2.** Egger's linear regression tests of the publications included in the meta-analysis.

**Table S3.** Subgroup analyses of iron parameters and IL-6.

**Figure S1.** Funnel plots for analyzing publication bias.

**Figure S2.** Sensitivity analysis for the included studies.

**Supplementary Table S1.** Characteristics of the publications included in the meta-analysis.

| Article (first author, year) | Study design | Populations         | Health Status                       | Duration                  | Intervention                      | N (Lf, Fe)    | Extracted outcome(s) |
|------------------------------|--------------|---------------------|-------------------------------------|---------------------------|-----------------------------------|---------------|----------------------|
| Rezk, 2016                   | R            | pregnant women      | IDA                                 | 8W                        | lactoferrin; ferrous sulfate      | 200 (100,100) | Hb                   |
| Paesano, 2006                | R            | pregnant women      | ID or IDA                           | 30D                       | lactoferrin; ferrous sulfate      | 205 (107,98)  | Hb, TSI              |
| Paesano, 2010-1              | R            | pregnant women      | ID or IDA                           | 30D                       | lactoferrin; ferrous sulfate      | 60 (30,30)    | Hb, TSI, SF, IL-6    |
| Paesano, 2010-2              | R            | non-pregnant women  | ID or IDA                           | 90D                       | lactoferrin; ferrous sulfate      | 60 (34,26)    | Hb, SI, SF           |
| Nappi, 2009                  | R, DB        | pregnant women      | IDA                                 | 30D                       | lactoferrin; ferrous sulfate      | 97 (49,48)    | Hb, SI, SF           |
| Paesano, 2014                | -            | pregnant women      | ID or IDA, hereditary thrombophilia | Intervened until delivery | lactoferrin; ferrous sulfate      | 253 (153,100) | Hb, SI, SF, IL-6     |
| Lepanto, 2018                | -            | pregnant            | hereditary thrombophilia            | 30D                       | lactoferrin; ferrous sulfate      | 65 (40,25)    | Hb, SI, SF, IL-6     |
| Lepanto, 2018                | -            | child-bearing women | hereditary thrombophilia            | 30D                       | lactoferrin; ferrous sulfate      | 73 (41,32)    | Hb, SI, SF, IL-6     |
| Mikulic, 2020                | R, SB        | infants             | healthy                             | 28D                       | holo-lactoferrin; ferrous sulfate | 51 (25,26)    | FIA                  |

---

|                   |   |                    |                                   |     |                                                 |            |     |
|-------------------|---|--------------------|-----------------------------------|-----|-------------------------------------------------|------------|-----|
| Lönnerdal, 2006-1 | R | non-pregnant women | healthy, slightly<br>anemic or ID | 28D | lactoferrin; ferrous<br>sulfate                 | 30 (10,20) | FIA |
| Lönnerdal, 2006-2 | R | non-pregnant women | healthy, slightly<br>anemic or ID | 28D | heat treated<br>lactoferrin; ferrous<br>sulfate | 30 (10,20) | FIA |

---

Lf, Lactoferrin group; CVD; D, day; DB, double-blinded; SB, single-blind; SF, Serum ferritin; Hb, Hemoglobin; Fe, ferrous sulfate group; W, week; FIA, Fractional iron absorption; IL-6, Interleukin-6; N, Number of people involved; ID, Iron deficiency; R, randomized; IDA, iron-deficiency anemia; SI, Serum iron.

**Supplementary Table S2.** Egger's tests of the publications included in the meta-analysis.

| Indicators               | <i>P</i> value of Egger's tests |
|--------------------------|---------------------------------|
| Serum iron               | 0.990                           |
| Serum ferritin           | 0.036                           |
| Hemoglobin concentration | 0.376                           |
| FIA                      | 0.345                           |
| IL-6                     | 0.689                           |

FIA, fractional iron absorption; IL-6, Interleukin-6.

**Supplementary Table S3.** Subgroup analyses of iron parameters and IL-6.

|                          | N | WMD (95% CI)            | <i>I</i> <sup>2</sup> (%) | <i>P</i> value <sup>1</sup> | <i>P</i> value <sup>2</sup> |
|--------------------------|---|-------------------------|---------------------------|-----------------------------|-----------------------------|
| Serum ferritin, ug/dL    |   |                         |                           |                             |                             |
| Populations              |   |                         |                           |                             |                             |
| pregnant women           | 4 | 14.41 (-0.45, 29.28)    | 99                        | <0.0001                     | 0.796                       |
| non-pregnant women       | 2 | 12.08 (8.16, 16.00)     | 85                        | 0.009                       |                             |
| Health Status            |   |                         |                           |                             |                             |
| ID or IDA                | 3 | 12.72 (-0.32, 25.77)    | 97                        | <0.0001                     | 0.836                       |
| hereditary thrombophilia | 3 | 14.52 (4.73, 24.31)     | 99                        | <0.0001                     |                             |
| Serum iron, ng/mL        |   |                         |                           |                             |                             |
| Populations              |   |                         |                           |                             |                             |
| pregnant women           | 5 | 31.03 (14.22, 47.85)    | 98                        | <0.0001                     | 0.094                       |
| non-pregnant women       | 2 | 68.25 (30.03, 106.46)   | 98                        | <0.0001                     |                             |
| Health Status            |   |                         |                           |                             |                             |
| ID or IDA                | 4 | 44.61 (14.53, 74.69)    | 99                        | <0.0001                     | 0.766                       |
| hereditary thrombophilia | 3 | 37.63 (25.65, 49.61)    | 93                        | <0.0001                     |                             |
| Hemoglobin, g/dL         |   |                         |                           |                             |                             |
| Populations              |   |                         |                           |                             |                             |
| pregnant women           | 6 | 10.45 (6.36, 14.54)     | 96                        | <0.0001                     | 0.260                       |
| non-pregnant women       | 2 | 16.33 (13.21, 19.45)    | 0                         | 0.55                        |                             |
| Health Status            |   |                         |                           |                             |                             |
| ID or IDA                | 5 | 9.90 (5.79, 14.02)      | 95                        | <0.0001                     | 0.253                       |
| hereditary thrombophilia | 3 | 14.91 (11.85, 17.97)    | 66                        | 0.05                        |                             |
| IL-6, pg/mL              |   |                         |                           |                             |                             |
| Populations              |   |                         |                           |                             |                             |
| pregnant women           | 3 | -47.63 (-60.36, -34.89) | 92                        | 0.0004                      | 0.817                       |
| non-pregnant women       | 1 | -44.00 (-48.56, -39.44) | —                         | —                           |                             |
| Health Status            |   |                         |                           |                             |                             |
| ID or IDA                | 1 | -41.00 (-46.67, -35.33) | —                         | —                           | 0.497                       |
| hereditary thrombophilia | 3 | -46.93 (-53.39, -40.47) | 89                        | 0.0001                      |                             |

ID, iron deficiency; IDA, iron deficiency anemia; IL-6, Interleukin-6.

<sup>1</sup>  $P$  values for heterogeneity within each subgroup.

<sup>2</sup>  $P$  values for heterogeneity between groups from metaregression.

—, data not available; N, the number of included studies; WMD, weighted mean difference.

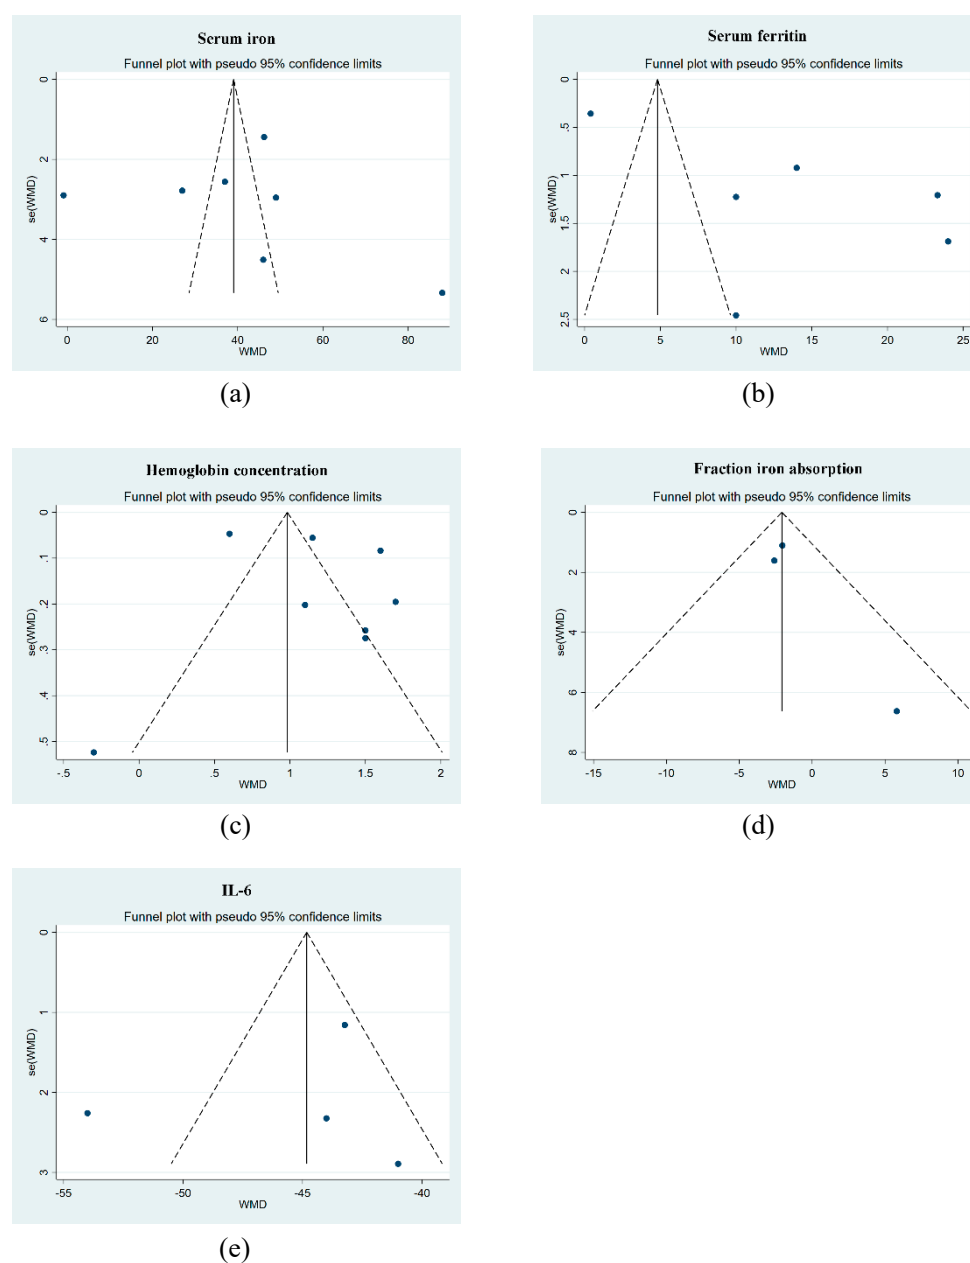

**Supplementary Figure S1.** Funnel plots for analyzing publication bias. Funnel plots with pseudo 95% confidence limits were generated in order to identify possible publication bias of the included studies. The mean differences are plotted against the standard error for the indicated indicators. Each symbol represents a single study. IL-6, Interleukin-6.

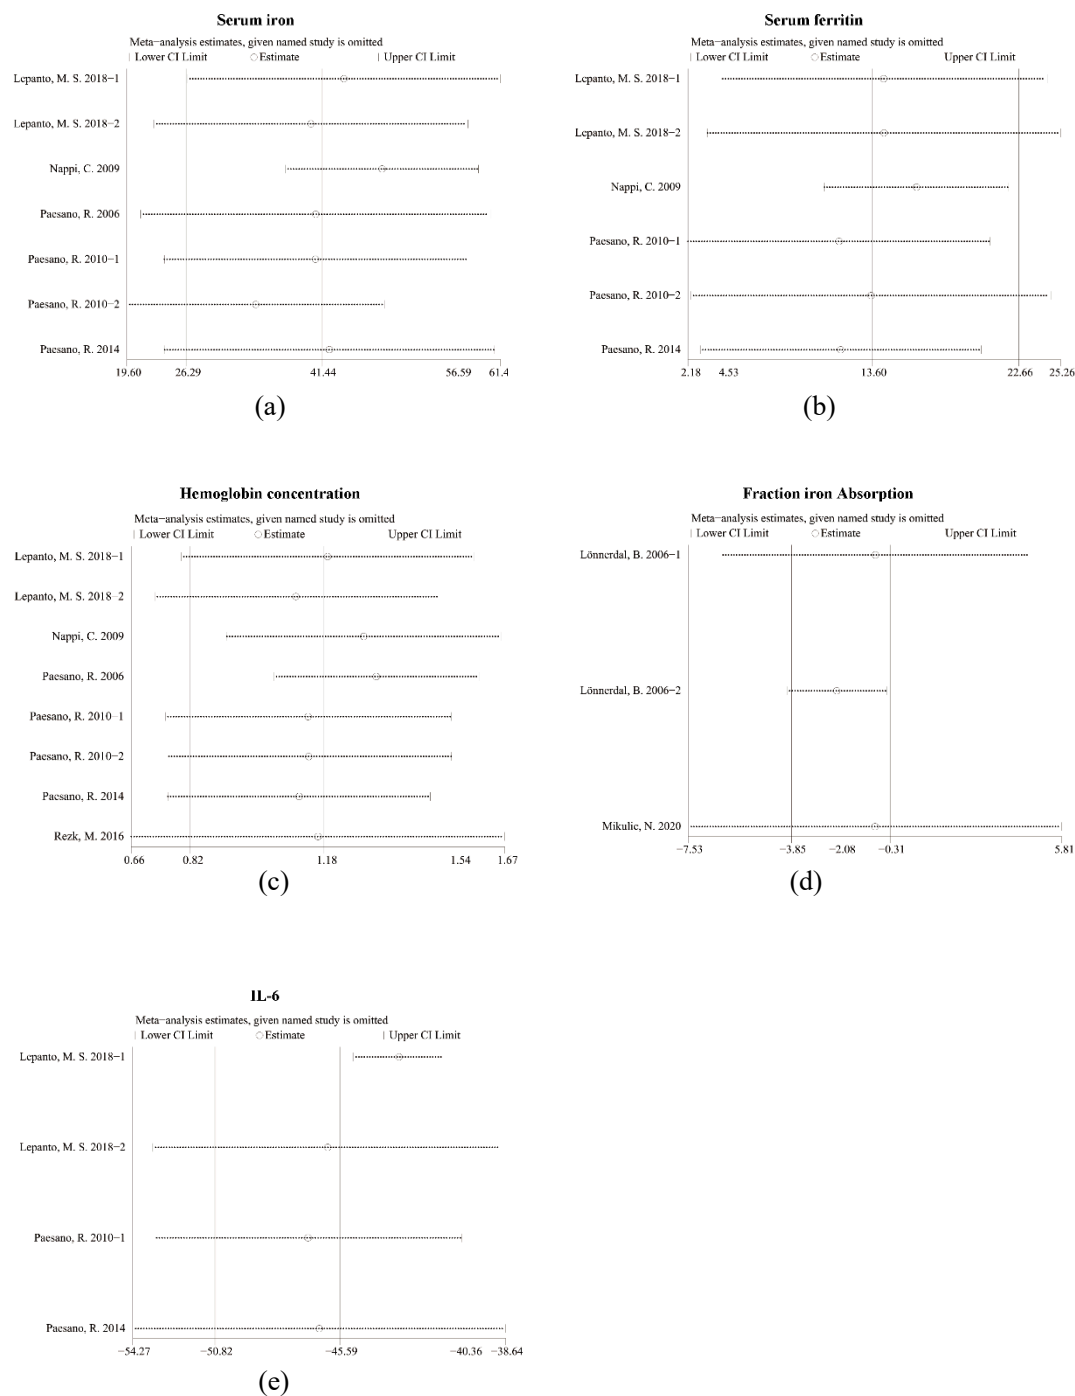

**Supplementary Figure S2.** Sensitivity analysis for the included studies. The results of a sensitivity test are shown for the indicated indicators. In each panel, each indicated study was omitted from the pooled analysis, and the effect on the total results was determined. Each circle and corresponding vertical tick represent the effect size and 95% CI after the corresponding study was omitted. For comparison, the three vertical lines indicate the positions of the effect size and the upper and lower limits of the 95% CI for the pooled results. IL-6, Interleukin-6.
